# Supplementary material
Source: PubMed Central journal article supplement (PMC6192608)
Supplement: supp_the2017-0604_onco12444-sup-0002-suppinfo02.pdf [file supp_the2017-0604_onco12444-sup-0002-suppinfo02.pdf]

Supplemental Tables for:  
 FDA Approval Summary: Mylotarg for Treatment of Patients with Relapsed or Refractory CD33-Positive Acute Myeloid Leukemia  
 David Steensma et al.

**Table S1:** Clinical Studies of GO Monotherapy in R/R AML

| Study/Reference              | Design                                                                                                                               | Population                                                                             | Endpoints   |
|------------------------------|--------------------------------------------------------------------------------------------------------------------------------------|----------------------------------------------------------------------------------------|-------------|
| <b><i>Unfractionated</i></b> |                                                                                                                                      |                                                                                        |             |
| Study 201                    | Single-arm, open-label Phase 2 trial<br>• GO 9 mg/m <sup>2</sup> x 2-3, 14-28d apart                                                 | Adults with CD33+ AML in first relapse after CR ≥ 6 months<br>- 84 patients            | CR rate     |
| Study 202                    | Single-arm, open-label Phase 2 trial<br>• GO 9 mg/m <sup>2</sup> x 2-3, 14-28d apart                                                 | Adults with CD33+ AML in first relapse after CR ≥ 6 months<br>- 95 patients            | CR rate     |
| Study 203                    | Single-arm, open-label Phase 2 trial<br>• GO 9 mg/m <sup>2</sup> x 2-3, 14-28d apart                                                 | Adults ≥ 60 years with CD33+ AML in first relapse after CR ≥ 3 months<br>- 98 patients | CR rate     |
| Study 101                    | Single-arm, open-label Phase 1 dose-escalation trial<br>• GO 0.25-9 mg/m <sup>2</sup> x 3, ≥14d apart                                | Adults with R/R CD33+ AML<br>- 41 patients                                             | Safety      |
| Study 102                    | Single-arm, open-label Phase 1 dose-escalation trial<br>• GO 6-9 mg/m <sup>2</sup> x1-2 doses, ≥14d apart (< 3 years, per kg dosing) | Pediatric patients with R/R CD33+ AML<br>- 29 patients                                 | CR+CRp rate |
| Study 103                    | Single-arm, open-label Phase 1-2 dose-escalation trial<br>GO 6-9 mg/m <sup>2</sup> x 2, ≥14d apart                                   | Japanese adults with R/R CD33+ AML<br>- 40 patients                                    | CR+CRp rate |
| Study 100374                 | Single-arm, open-label Phase 4 dose-escalation trial                                                                                 | Adults with relapsed CD33+ AML post HSCT<br>- 37 patients                              | CR+CRp rate |

---

|                          |                                                                                                                                                                                                                                                                                |                                                                            |             |
|--------------------------|--------------------------------------------------------------------------------------------------------------------------------------------------------------------------------------------------------------------------------------------------------------------------------|----------------------------------------------------------------------------|-------------|
|                          | <ul style="list-style-type: none"> <li>• GO 2-6 mg/m<sup>2</sup> x 2, ≥14d apart</li> <li>• Consolidation: up to 4 doses GO</li> </ul>                                                                                                                                         |                                                                            |             |
| Study 100863             | Single-arm, open-label Phase 4 trial <ul style="list-style-type: none"> <li>• GO 9 mg/m<sup>2</sup> x 2, 14d apart</li> <li>• Studied steroid prophylaxis</li> </ul>                                                                                                           | Adults with R/R CD33+ AML<br>- 23 patients                                 | Safety      |
| Roboz 2002 [33]          | Prospective, single-arm, open-label trial <ul style="list-style-type: none"> <li>• GO 9 mg/m<sup>2</sup> x 2, 14d apart</li> </ul>                                                                                                                                             | Adults with CD33+ R/R or untreated AML, CML-BC, or RAEB-T<br>- 43 patients | CR+CRp rate |
| Zwaan 2003 [17]          | Retrospective, single-arm, open-label trial <ul style="list-style-type: none"> <li>• GO 4-9 mg/m<sup>2</sup> x1-3 doses</li> </ul>                                                                                                                                             | Children with CD33+ R/R AML<br>- 15 patients                               | CR+CRp rate |
| Piccaluga 2004 [34]      | Prospective, single-arm, open-label trial <ul style="list-style-type: none"> <li>• GO 9 mg/m<sup>2</sup> x 2-3 q14-28d (n=16)</li> <li>or</li> <li>• GO 6 mg/m<sup>2</sup> x 2-3, q14-28d (n=7)</li> <li>or</li> <li>• GO 1.5 mg/m<sup>2</sup> x 2-3, q14-28d (n=1)</li> </ul> | Adults with CD33+ R/R AML<br>- 24 patients                                 | CR+CRp rate |
| van der Heiden 2006 [26] | Retrospective, open-label trial <ul style="list-style-type: none"> <li>• GO 6-9 mg/m<sup>2</sup> x1-3 doses</li> </ul>                                                                                                                                                         | Adults with untreated or R/R AML<br>- 38 patients                          | CR+CRp rate |
| Brethon 2006 [10]        | Retrospective, open-label trial <ul style="list-style-type: none"> <li>• GO 7.5-9 mg/m<sup>2</sup> x 1-2,14-28d apart</li> </ul>                                                                                                                                               | Children with CD33+ R/R AML<br>- 5 patients (unfractionated)               | CR+CRp rate |
| Thomas 2005 [11]         | Retrospective, open-label trial <ul style="list-style-type: none"> <li>• GO 6 mg/m<sup>2</sup> x2, 14d apart</li> </ul>                                                                                                                                                        | Adults with R/R AML<br>- 6 patients (unfractionated)                       | CR+CRp rate |

---

**Fractionated GO 3 mg/m<sup>2</sup> d 1, 4, 7**

---

---

|                                   |                                                                            |                                                                                 |             |
|-----------------------------------|----------------------------------------------------------------------------|---------------------------------------------------------------------------------|-------------|
| Taksin 2007 [9]<br>(MyloFrance 1) | Single-arm, open-label Phase 2 trial<br>• GO 3 mg/m <sup>2</sup> d 1, 4, 7 | Adults with CD33+ AML in first relapse after CR ≥3, ≤18 months<br>- 57 patients | CR+CRp rate |
| Brethon 2006<br>[10]              | Retrospective, open-label trial<br>• GO 3 mg/m <sup>2</sup> d1, 4, 7       | Children with CD33+ R/R AML<br>- 6 patients (fractionated)                      | CR+CRp rate |
| Thomas 2005<br>[11]               | Retrospective, open-label trial<br>• GO 3 mg/m <sup>2</sup> d1, 4, 7       | Adults with R/R AML<br>- 24 patients (fractionated)                             | CR+CRp rate |

---

Abbreviations: AML, acute myeloid leukemia; CD, cluster of differentiation; CML-BC, chronic myeloid leukemia in blast crisis; CR, complete remission; CrCl, creatinine clearance; CRp, complete remission with incomplete platelet recovery; d, days; GO, gemtuzumab ozogamicin; h, hours; HSCT, hematopoietic stem cell transplantation; RAEB-T, refractory anemia with excess blasts in transformation; R/R, relapsed and/or refractory.

**Table S2:** Early mortality by GO monotherapy dose-schedule for R/R AML

| Dose regimen                              | Study                | No. Patients | Early Deaths <sup>a</sup><br>N (%; 95% CI) |
|-------------------------------------------|----------------------|--------------|--------------------------------------------|
| <b>9 mg/m<sup>2</sup> x 2<sup>b</sup></b> | <b>All combined</b>  | <b>410</b>   | <b>70 (17%, 14-21%)</b>                    |
|                                           | 201                  | 84           | 16 (19%)                                   |
|                                           | 202                  | 95           | 14 (15%)                                   |
|                                           | 203                  | 98           | 21 (21%)                                   |
|                                           | 101                  | 7            | 1 (14%)                                    |
|                                           | 102                  | 13           | 2 (15%)                                    |
|                                           | 103                  | 31           | 4 (13%)                                    |
|                                           | 100863               | 23           | 5 (22%)                                    |
|                                           | Piccaluga, 2004 [34] | 16           | 1 (6%)                                     |
| Roboz, 2002 [33]                          | 43                   | 6 (14%)      |                                            |
| <b>6 mg/m<sup>2</sup> x 2<sup>b</sup></b> | <b>All combined</b>  | <b>41</b>    | <b>5 (12%, 5-27%)</b>                      |
|                                           | 101                  | 8            | 2 (25%)                                    |
|                                           | 102                  | 14           | 1 (7%)                                     |
|                                           | 103                  | 6            | 0 (0%)                                     |
|                                           | 100374               | 6            | 0 (0%)                                     |
|                                           | Piccaluga, 2004 [34] | 7            | 2 (29%)                                    |
| <b>3 mg/m<sup>2</sup> d1,4,7</b>          | <b>All combined</b>  | <b>81</b>    | <b>7 (9%, 4-18%)</b>                       |
|                                           | MyloFrance 1         | 57           | 4 (7%)                                     |
|                                           | Thomas, 2005 [11]    | 24           | 3 (13%) <sup>c</sup>                       |

Abbreviations: CI, confidence interval; No., number.

<sup>a</sup>Defined as through treatment day 43 for studies 101-203, 100863, 100374, MyloFrance 1, and Thomas 2005, “during the treatment period” in Piccaluga 2004, and as “early deaths” in Roboz 2002.

<sup>b</sup>Note that 201-203, 101, Piccaluga 2004 and Roboz 2002 allowed for up to 3 doses of GO.

<sup>c</sup>Determined through personal communication with Dr. Thomas.

**Table S3: Time to hematopoietic recovery for CR/CRp responses**

| Parameter           | Median time in days (range)                        |                                                            |
|---------------------|----------------------------------------------------|------------------------------------------------------------|
|                     | <u>9 mg/m<sup>2</sup> x 2</u><br>201-203<br>(N=98) | <u>3 mg/m<sup>2</sup> d1,4,7</u><br>MyloFrance-1<br>(N=19) |
| ANC > 0.5 Gi/L      | 42 (16-100)                                        | 23 (10-38)*                                                |
| Platelets > 50 Gi/L | 51 (15-528) <sup>†</sup>                           | 20 (0-43) <sup>‡</sup>                                     |

Abbreviations: ANC, absolute neutrophil count; d, days; N, number.

\*One patient had missing data.

<sup>†</sup>Given failure to achieve the target platelet level, 22 patients were censored at the date of last laboratory evaluation prior to HSCT, other anti-leukemic therapy, or death (whichever came first).

<sup>‡</sup>Given failure to achieve the target platelet level, 1 patient was censored on day 43. Two further patients had missing data.
